# Supplementary material
Source: publisher figshare collection journal article supplement (https://tandf.figshare.com/ndownloader/files/40928607)
Supplement: Supplementary file 1 [file 40928607]

Supporting Information

**Dual-responsive targeted hollow mesoporous silica nanoparticles for cancer photodynamic therapy and chemotherapy**

Yuqi Chena,1, Xuelian Wangb,1, Zhuhang Lub, Cong Changb, Yueli Zhanga, Bo Lua, *

aSchool of Chemistry, Chemical Engineering and Life Sciences, Wuhan University of Technology, Wuhan 430070, PR China.

bCollege of Pharmacy, Hubei University of Chinese Medicine, Wuhan, PR China.

*Corresponding author.

E-mail: [lvb@whut.edu.cn](mailto:lvb@whut.edu.cn)

Tel & Fax: 086-027-87749300

1These authors contributed equally to this work.



**Figure S1.** Hydrodynamic diameter distributions of HMSNs and HMSNs-CS-HDA.





**Figure S2.** XRD of HMSNs and DOX@HMSNs-CS-HAD.

**Figure S3.** BJH pore size distributions of HMSNs and HMSNs-CS-HAD.



**Figure S4. L02 cells incubated with free DOX+ICG and ID@HCH.**

**Table S1** BET and BJH parameters of HMSNs and HMSNs-CS-HDA.

| **Sample** | **BET surface area**  **SBET (m² g-1)** | **BJH pore volume**  **VP (cm³ g-1)** | **BJH pore diameter**  **VBJH (nm)** |
| --- | --- | --- | --- |
| HMSNs | 956 | 1.34 | 5.59 |
| HMSNs-CS-HDA | 70 | 0.18 | / |

**Table S2** IC50 values of various HMSNs on HepG2 cells after 24 h.

|  | **Free DOX**  **(μg mL-1)** | **ICG+DOX + laser (μg mL-1)** | **DOX@HCH (μg mL-1)** | **ID@HCH+ laser (μg mL-1)** |
| --- | --- | --- | --- | --- |
| HepG2 cells | 0.49 | 0.44 | 0.28 | 0.12 |
